# Supplementary material for: Fatty Acids in Waste Tissues: The Nutraceutical Value of Gonads and Livers from the Moroccan Hypophthalmichthys molitrix and Cyprinus carpio Fishes
Source: MDPI journal article supplement (doi:10.3390/md21030188), 2023-03-17
Supplement: s1 [file s1]

TABLE S1:

**Table S1.** Principal SFA, MUFA, and  $\omega$ -6 FA (mean mg  $\times 100\text{g}^{-1}$  of tissue  $\pm$  SE), of gonads, liver and fillet tissues of immature and mature common carp (*Cyprinus carpio*) and silver carp (*Hypophthalmichthys molitrix*).

|                      | SFA<br>(mg/100g)   |                    | MUFA<br>(mg/100g)  |                   | PUFA: $\omega$ -6 <sup>f</sup> FA<br>(mg/100g) |                                |
|----------------------|--------------------|--------------------|--------------------|-------------------|------------------------------------------------|--------------------------------|
|                      | C16:0<br>(mg/100g) | C18:0<br>(mg/100g) | C18:1 $\omega$ -9  | C18:1 $\omega$ -7 | C20:4 $\omega$ -6                              | C18:2 $\omega$ -6, $\omega$ -9 |
| Common carp immature |                    |                    |                    |                   |                                                |                                |
| G                    | 21.59 $\pm$ 1.18   | 6.51 $\pm$ 0.04    | 24.39 $\pm$ 1.46   | 5.79 $\pm$ 0.29   | 14.36 $\pm$ 1.02                               | 8.94 $\pm$ 0.32                |
| L                    | 117.59 $\pm$ 6.72  | 56.60 $\pm$ 0.89   | 93.09 $\pm$ 2.74   | 44.75 $\pm$ 2.52  | nd.                                            | 14.56 $\pm$ 2.31               |
| F                    | 10.77 $\pm$ 5.52   | 6.32 $\pm$ 3.52    | 11.80 $\pm$ 6.52   | 4.21 $\pm$ 2.67   | 4.63 $\pm$ 1.82                                | 3.48 $\pm$ 2.30                |
| Silver carp immature |                    |                    |                    |                   |                                                |                                |
| G                    | 18.94 $\pm$ 3.81   | 7.48 $\pm$ 1.25    | 37.51 $\pm$ 11.14  | 5.80 $\pm$ 1.19   | 4.21 $\pm$ 0.65                                | 13.71 $\pm$ 3.96               |
| L                    | 55.28 $\pm$ 22.53  | 15.33 $\pm$ 5.25   | 22.19 $\pm$ 7.67   | 9.23 $\pm$ 3.58   | nd.                                            | 9.33 $\pm$ 5.00                |
| F                    | 5.41 $\pm$ 1.74    | 4.82 $\pm$ 1.87    | 4.59 $\pm$ 1.62    | 1.17 $\pm$ 0.50   | 1.68 $\pm$ 0.69                                | 0.92 $\pm$ 0.44                |
| Common carp mature   |                    |                    |                    |                   |                                                |                                |
| G                    | 145.20 $\pm$ 12.20 | 49.44 $\pm$ 3.76   | 151.88 $\pm$ 13.23 | nd.               | 34.18 $\pm$ 2.83                               | 26.34 $\pm$ 0.69               |
| L                    | 50.90 $\pm$ 9.64   | 28.89 $\pm$ 3.85   | 73.67 $\pm$ 18.53  | nd.               | nd.                                            | 5.74 $\pm$ 1.60                |
| F                    | 12.53 $\pm$ 2.22   | 8.84 $\pm$ 2.24    | 20.29 $\pm$ 3.89   | nd.               | 5.62 $\pm$ 1.42                                | 3.57 $\pm$ 0.89                |
| Silver carp mature   |                    |                    |                    |                   |                                                |                                |
| G                    | 123.25 $\pm$ 6.16  | 29.06 $\pm$ 1.45   | 128.63 $\pm$ 13.60 | 34.15 $\pm$ 1.71  | 6.13 $\pm$ 0.31                                | 111.35 $\pm$ 12.00             |
| L                    | 62.11 $\pm$ 30.51  | 18.61 $\pm$ 8.97   | 93.18 $\pm$ 8.04   | nd.               | nd.                                            | 9.45 $\pm$ 5.03                |
| F                    | 48.58 $\pm$ 4.26   | 16.45 $\pm$ 1.65   | 85.47 $\pm$ 1.55   | 11.48 $\pm$ 1.70  | 5.48 $\pm$ 0.99                                | 8.24 $\pm$ 0.99                |

G: gonads tissues; L: liver tissues; F: fillet tissues: SFA in tissues, including C16:0 (Palmitic acid) and C18:0 (Stearic acid); MUFA in tissues, including, C18:1 $\omega$ -7 (Vaccenic acid), C18:1 $\omega$ -9 (Oleic acid); PUFA including, including C18:2 $\omega$ -6 (Linoleic acid), C20:4 $\omega$ -6 (Arachidonic acid).
